# Supplementary material for: Single-layer membranes for organic solvent nanofiltration: a molecular dynamics simulation and comparative experimental study
Source: Royal Society of Chemistry journal article supplement (doi:10.1039/d1ra09061e), 2022-01-01
Supplement: d1ra09061e1.pdf [file d1ra09061e1.pdf]

**Support Information**

Single-layer Membranes for Organic Solvent Nanofiltration : A  
Molecular Dynamics Simulation Study and Comparative Experimental

*Xuejian Li<sup>a</sup>, Yue Liu<sup>a</sup>, Qiaohong Liu<sup>b,\*</sup>, Zilong Zheng<sup>a</sup>, Hongxia Guo<sup>a,\*</sup>*

<sup>a</sup> Xuejian Li, Yue Liu, Prof. Zilong Zheng, Prof. Hongxia Guo

Key Laboratory of Advanced Functional Materials of the Ministry of Education,  
College of Materials Science and Engineering

Beijing University of Technology, 100124 Beijing, P. R. China

Email: liuqiaohong@bjut.edu.cn

<sup>b</sup> Dr. Qiaohong Liu

Beijing Key Laboratory for Green Catalysis and Separation  
College of Environmental and Chemical Engineering

Beijing University of Technology, 100124 Beijing, P. R. China

Email: liuqiaohong@bjut.edu.cn

**Table S1.** Force field parameters of MoS<sub>2</sub><sup>1-3</sup>

| Atom | charge | $\sigma/\text{\AA}$ | $\epsilon/(\text{kJ mol}^{-1})$ |
|------|--------|---------------------|---------------------------------|
| Mo   | 0.76   | 4.43                | 0.485                           |
| S    | 0.38   | 3.34                | 2.085                           |

  

| bonds | $r_0/\text{\AA}$ | $k_r/(\text{kJ mol}^{-1} \text{\AA}^{-2})$ |
|-------|------------------|--------------------------------------------|
| Mo-S  | 2.41             | 430.3                                      |

  

| angles  | $\theta_0/\text{deg}$ | $k_\theta/(\text{kJ mol}^{-1} \text{rad}^{-2})$ |
|---------|-----------------------|-------------------------------------------------|
| S-Mo-S  | 83.8                  | 1187.7                                          |
| Mo-S-Mo | 83.8                  | 2050.0                                          |

**Table S2.** Solvents and solute.

| Solvent      | Mw<br>(g / mol) | Density<br>(kg / L) | diameter<br>$d_{\text{kinetic}} (\text{\AA})^{4,5}$ | Viscosity<br>$\mu (\text{MPa} \cdot \text{s})$ | Hansen Solubility<br>parameter $\delta (\text{MPa}^{1/2})^3$ |
|--------------|-----------------|---------------------|-----------------------------------------------------|------------------------------------------------|--------------------------------------------------------------|
| Acetonitrile | 41.05           | 0.757               | 3.4                                                 | 0.32 <sup>5,6</sup>                            | 24.6                                                         |
| Methanol     | 32.04           | 0.778               | 3.8                                                 | 0.49 <sup>4,7</sup>                            | 29.7                                                         |
| Hexane       | 86.18           | 0.653               | 4.3                                                 | 0.29 <sup>6</sup>                              | 14.9                                                         |
| Ethanol      | 46.07           | 0.794               | 4.5                                                 | 1.17 <sup>4,7</sup>                            | 26.6                                                         |
| Acetone      | 58.08           | 0.797               | 4.7                                                 | 0.29 <sup>7</sup>                              | 20.1                                                         |
| Propanol     | 60.10           | 0.80                | 6.3                                                 | 2.27 <sup>7,8</sup>                            | 23.4                                                         |

| acetaminophen                                 |            |                                                                                    |
|-----------------------------------------------|------------|------------------------------------------------------------------------------------|
| Formula                                       | Mw (g/mol) | Structure                                                                          |
| C <sub>8</sub> H <sub>9</sub> NO <sub>2</sub> | 151.16     | 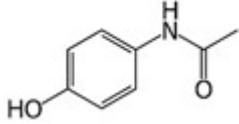 |

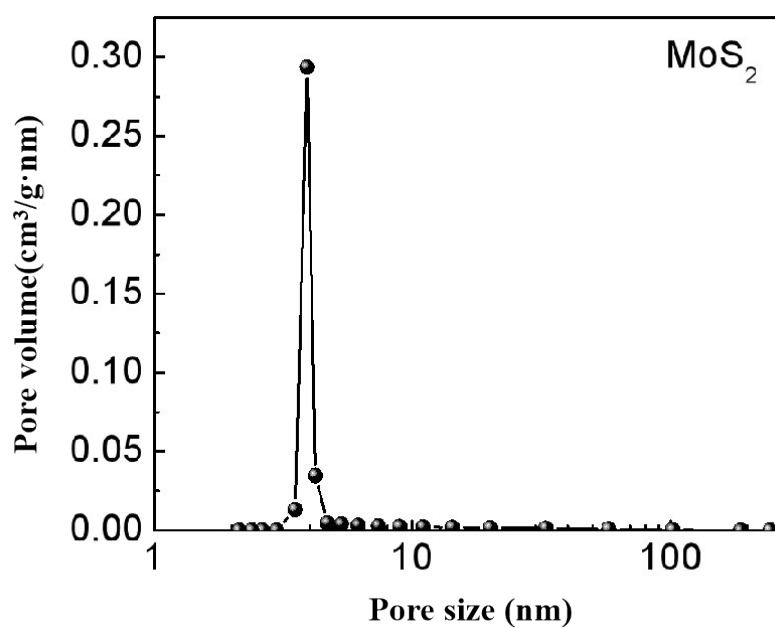

Figure. S1 Pore size distribution of MoS<sub>2</sub> nanosheets in experiment

In this study, the pore size distribution of MoS<sub>2</sub> nano sheets prepared by hydrothermal method was tested and analyzed by autosorb IQ N<sub>2</sub> adsorption desorption instrument (Beijing jinepu Technology Co. Ltd.). The measured aperture range is full hole. Prepare the sample in situ at about 80.9h under the condition of MoS<sub>2</sub>, and put it into the nano tube for degassing.

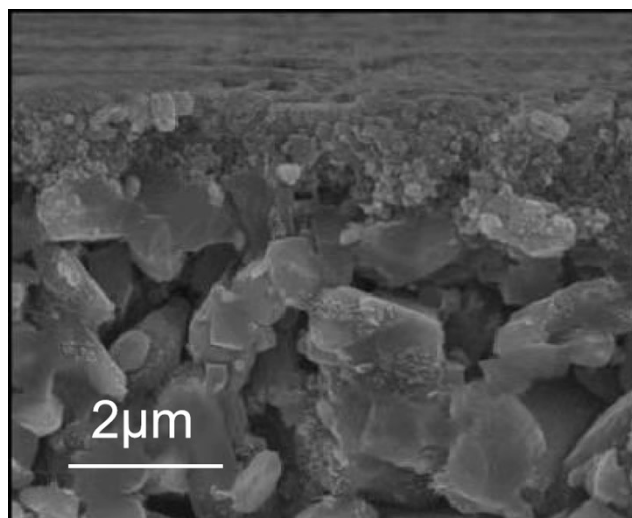

Fig. S2 SEM of the cross-sectional of MoS<sub>2</sub> membranes

(Preparation conditions: reaction temperature, 220 °C; reaction time, 30h)

Scanning electron microscopy (SEM) was used to characterize the cross-sectional micro morphology of MoS<sub>2</sub> tubular ceramic film. The results are shown in Figure S3. It can be seen from the figure that the thickness of MoS<sub>2</sub> thin layer is about 200nm,

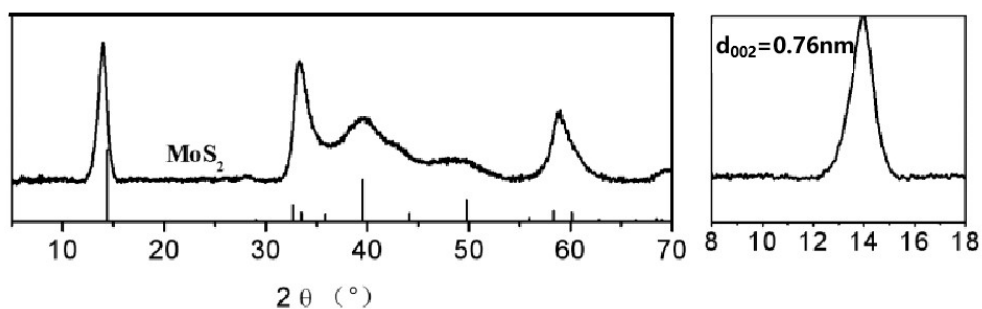

Fig. S3 XRD characterization of MoS<sub>2</sub> nanosheets (reaction time 30 h; reaction temperature 220 °C)

It can be seen from figure S3 that during hydrothermal reaction, the hydrothermal products are  $\theta$  MoS<sub>2</sub> characteristic peaks appeared at about 14 °, 32 °, 39 ° and 58 °, indicating that MoS<sub>2</sub> nanosheets were prepared in hydrothermal solvent. According to the Bragg equation, the spacing of MoS<sub>2</sub> nano flakes is 0.76 nm. The thickness of each molybdenum disulfide molecular layer is about 0.626 nm. Therefore, the layer spacing of MoS<sub>2</sub> is 1.4nm

**Table S3.** force field parameters of solvents

|              |   |          | charge | sigma  | epsilon |
|--------------|---|----------|--------|--------|---------|
| Methanol     | C | opls_157 | +0.145 | 0.350  | 0.276   |
|              | H | Opls_140 | +0.040 | 0.250  | 0.126   |
|              |   | Opls_155 | +0.418 | 0.000  | 0.000   |
|              | O | Opls_154 | -0.683 | 0.312  | 0.711   |
| Ethanol      | C | Opls_157 | +0.145 | 0.35   | 0.276   |
|              |   | Opls_135 | -0.180 | 0.350  | 0.276   |
|              | H | Opls_155 | +0.418 | 0.00   | 0.000   |
|              |   | Opls_140 | +0.040 | 0.25   | 0.126   |
|              | O | Opls_154 | -0.683 | 0.312  | 0.711   |
| Propanol     |   | Opls_157 | +0.145 | 0.350  | 0.276   |
|              | C | Opls_136 | -0.120 | 0.3500 | 0.276   |
|              |   | Opls_135 | -0.180 | 0.3500 | 0.276   |
|              | H | Opls_155 | +0.418 | 0.000  | 0.000   |
|              |   | Opls_140 | +0.040 | 0.250  | 0.126   |
|              | O | Opls_154 | -0.683 | 0.3120 | 0.711   |
| acetonitrile | C | Opls_754 | +0.460 | 0.3300 | 0.276   |
|              |   | Opls_755 | -0.080 | 0.3300 | 0.276   |
|              | H | Opls_140 | +0.040 | 0.250  | 0.126   |
|              | N | Opls_753 | -0.560 | 0.3200 | 0.711   |
| N-hexane     | C | Opls_135 | -0.180 | 0.3500 | 0.276   |

|         |          |        |        |       |
|---------|----------|--------|--------|-------|
|         | Opls_136 | -0.120 | 0.3500 | 0.276 |
| H       | Opls_140 | +0.040 | 0.250  | 0.126 |
|         | Opls_455 | -0.500 | 0.350  | 0.276 |
| C       | Opls_623 | +0.732 | 0.355  | 0.293 |
| acetone | Opls_376 | +0.139 | 0.2500 | 0.209 |
|         | Opls_771 | -0.566 | 0.296  | 0.879 |

## References

1. Reid RC, Sherwood TK, Street RE. The Properties of Gases and Liquids. *Phys Today* 1959;**12**:38-40. Doi:10.1063/1.3060771.
2. Vikas V. Soumya S. MD simulations of molybdenum disulphide (MoS<sub>2</sub>): Force-field parameterization and thermal transport behavior. *Computational Materials Science* 2010;**48**:101–108. doi:10.1016/j.commatsci.2009.12.009.
3. Sresht V, Govind Rajan A, Bordes E, Strano MS, Pádua AAH, Blankschtein D. Quantitative Modeling of MoS<sub>2</sub> – Solvent Interfaces: Predicting Contact Angles and Exfoliation Performance using Molecular Dynamics. *The Journal of Physical Chemistry C* 2017;**121**:9022-31. Doi:10.1021/acs.jpcc.7b00484.
4. Liang T, Phillpot SR, Sinnott SB. Parametrization of a reactive many-body potential for Mo – S systems. *Physical review. B, Condensed matter and materials physics* 2009;**79**. Doi:10.1103/PhysRevB.79.245110.
5. Karan S, Jiang Z, Livingston AG. Sub – 10 nm polyamide nanofilms with ultrafast solvent transport for molecular separation. *Science (American Association for the Advancement of Science)* 2015;**348**:1347-51. Doi:10.1126/science.aaa5058.
6. Van der Perre S, Van Assche T, Bozbiyik B, Lannoeye J, De Vos DE, Baron GV *et al.* Adsorptive Characterization of the ZIF-68 Metal-Organic Framework: A Complex Structure with Amphiphilic Properties. *Langmuir* 2014;**30**:8416-24. Doi:10.1021/la501594t.
7. Michailidou EK, Assael MJ, Huber ML, Abdulagatov IM, Perkins RA. Reference Correlation of the Viscosity of n - Heptane from the Triple Point to 600 K and up to 248 MPa. *J Phys Chem Ref Data*

2014;**43**:23103. Doi:10.1063/1.4875930.

8. Xu Y, Lin J, Gao C, Van der Bruggen B, Shen Q, Shao H *et al.* Preparation of High-Flux Nanoporous Solvent Resistant Polyacrylonitrile Membrane with Potential Fractionation of Dyes and Na<sub>2</sub>SO<sub>4</sub>. *Ind Eng Chem Res* 2017;**56**:11967-76. Doi:10.1021/acs.iecr.7b03409.
